# Supplementary material
Source: PubMed Central journal article supplement (PMC4807495)
Supplement: IAI.01361-15_zii999091624so1.pdf [file IAI.01361-15_zii999091624so1.pdf]

Supplementary Figure 1 *Bechelli et al.*

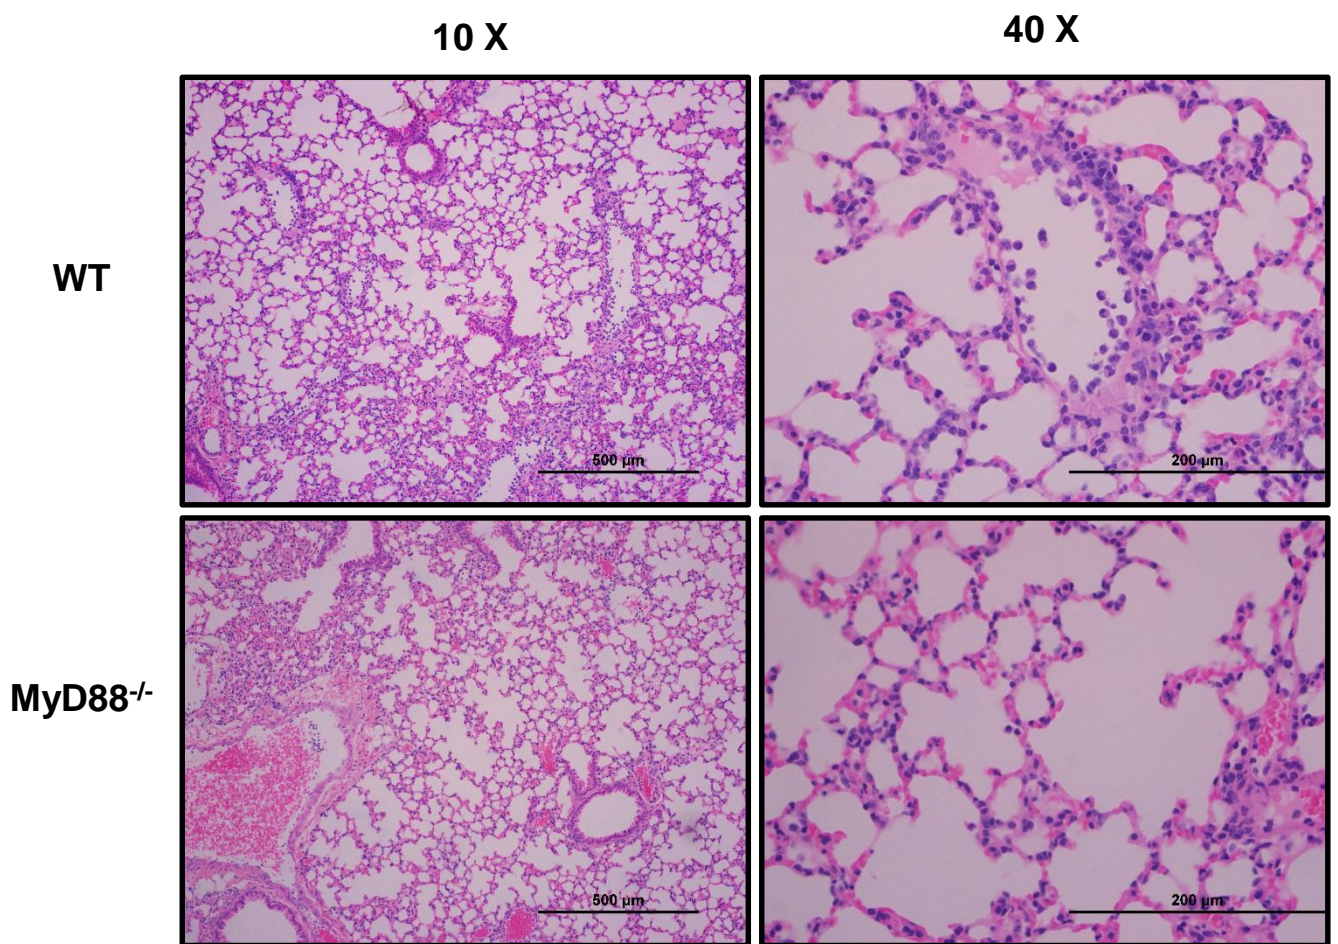

**Supplementary Fig 1** Inflammatory cellular accumulation in lung of infected WT and *MyD88*<sup>-/-</sup> mice. WT and *MyD88*<sup>-/-</sup> mice were infected i.v. with *R. australis* ( $8 \times 10^5$  PFUs per mouse). On day 4 p.i., mice were sacrificed and tissues were isolated and analyzed. Histopathological staining of lung from infected mice under both magnifications 10X and 40 X.

Supplementary Figure 2 *Bechelli et al.*

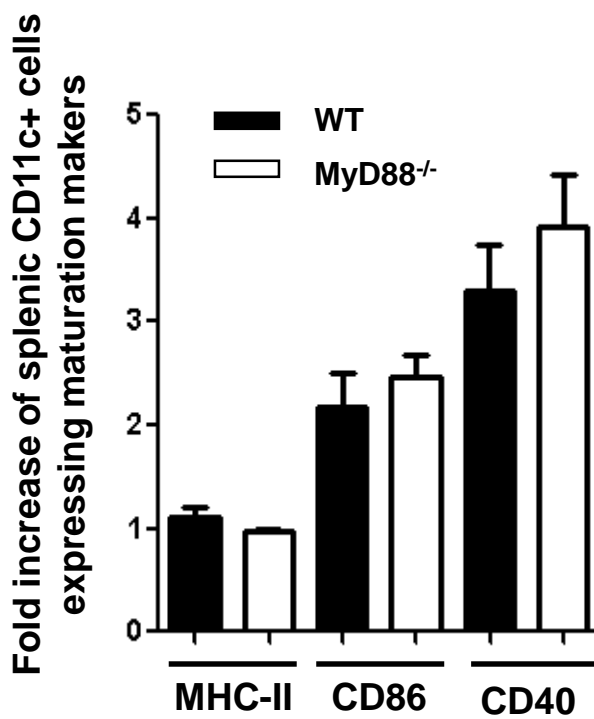

**Supplementary Fig 2** Maturation of splenic DCs in WT and MyD88<sup>-/-</sup> mice *in vivo*. WT and MyD88<sup>-/-</sup> mice were infected i.v. with *R. australis* ( $8 \times 10^5$  PFUs per mouse). On day 1 p.i., mice were sacrificed, and spleens were dispersed into a single cell suspension with a plunger and passed through a 100  $\mu$ m-strainer prior to flow cytometric analysis. Expression levels of MHC-II, CD86, and CD40 in cells gated on CD11c<sup>+</sup> were determined by flow cytometric analysis.
